# Supplementary material for: Apocynin Dietary Supplementation Delays Mouse Ovarian Ageing
Source: Hindawi journal article supplement (doi:10.1155/2019/5316984), 2019-10-20

1 **Supplementary Figure 1** – Low amplification images of protein nitration and lipofuscin  
2 deposition in mice ovaries.

3 **Supplementary figure 2** – Low amplification images of protein carbonylation in mice ovaries.

4

# Supplementary Figure 1

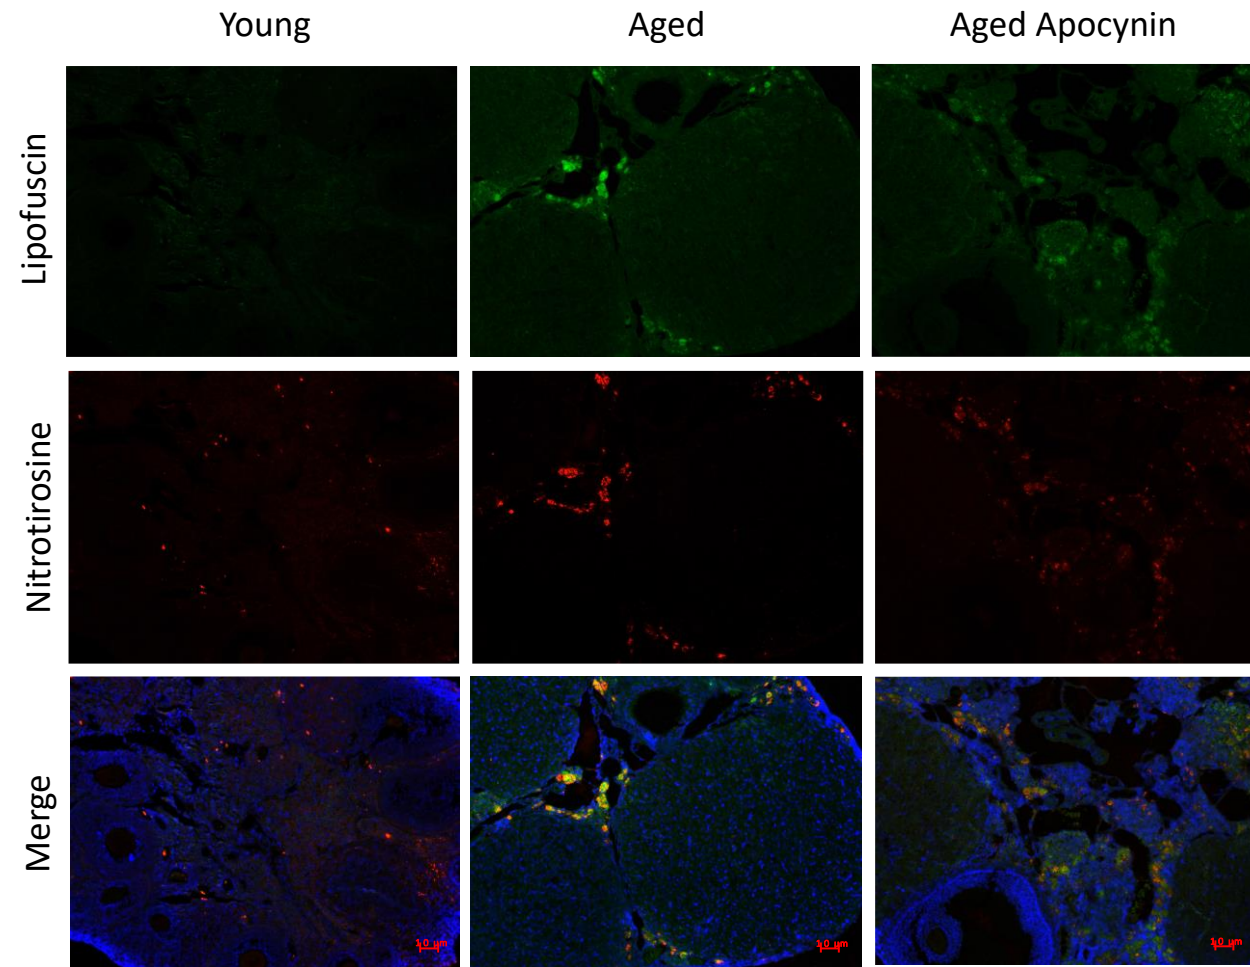

## Supplementary Figure 2

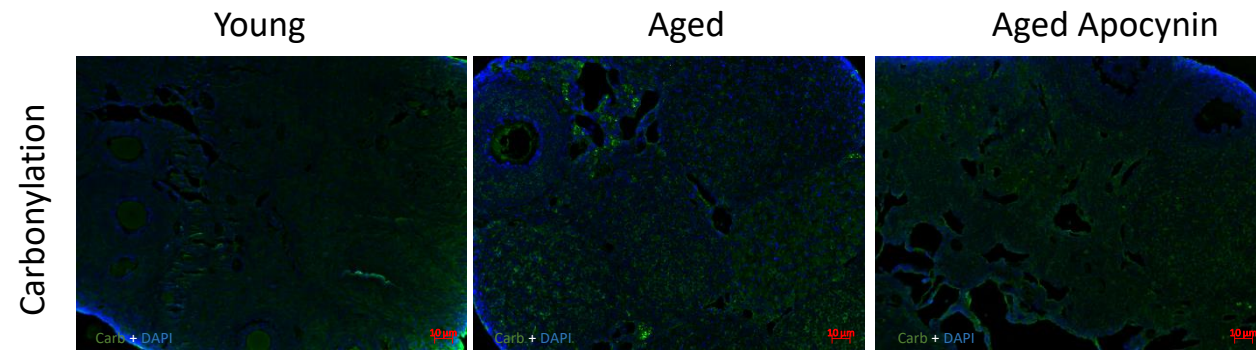

Supplement: f1 [file 5316984.f1.pdf]
